# Supplementary material
Source: HighWire-hosted journal article supplement (https://bmjopen.bmj.com/content/14/6/e076876)
Supplement: inline-supplementary-material-2 [file inline-supplementary-material-2.pdf]

Appendix II: Data Extraction Template

Extracted by:

Date:

|                                                                                                                       |  |
|-----------------------------------------------------------------------------------------------------------------------|--|
| Evidence source Details and Characteristics                                                                           |  |
| Author                                                                                                                |  |
| Year                                                                                                                  |  |
| Title                                                                                                                 |  |
| Country                                                                                                               |  |
| Aims/Purpose                                                                                                          |  |
| Target population or Study population and sample size                                                                 |  |
| Concept                                                                                                               |  |
| Context or Setting                                                                                                    |  |
| Methodology                                                                                                           |  |
| Details/Results extracted from source of evidence (in relation to the concept of not the scoping review)              |  |
| Risk management options addressed in decision aid                                                                     |  |
| Format of decision aid (paper, web-based etc.)                                                                        |  |
| Presentation of risks and benefits in decision aid                                                                    |  |
| Included specific advantages & disadvantages of each option                                                           |  |
| Are there separate sections for BRCA1 & BRCA2 mutation carriers?                                                      |  |
| Does the decision aid facilitate users to work through their values & how they feel about the different options? How? |  |
| Disclaimer(s) provided? If yes provide details                                                                        |  |
| Patient & Public Involvement (PPI) in decision aid development                                                        |  |
| Other features of decision aid                                                                                        |  |
| Efficacy of decision aid on decision related outcomes (if applicable)                                                 |  |

|                                                                                                                                     |  |
|-------------------------------------------------------------------------------------------------------------------------------------|--|
| Does the DA provide a recommendation for which option(s) the patient should choose?                                                 |  |
| Intended moment(s) of use of DA eg. Self-administered by patient or interview administered by clinician during routine consultation |  |
| Author reported strengths & weaknesses of DA                                                                                        |  |
| Author correspondence:<br>(Details of correspondence with study authors for additional information or clarification of queries)     |  |
| Additional Notes                                                                                                                    |  |
| References:<br>(Additional relevant articles cited in reference list of article)                                                    |  |
