# Supplementary material
Source: HighWire-hosted journal article supplement (https://bmjopen.bmj.com/content/14/6/e076876)
Supplement: inline-supplementary-material-3 [file inline-supplementary-material-3.pdf]

| Developer& Year <sup>#</sup> | Country | Title                                                                                                                     | Target Population                                                                                | DA designed exclusively for BRCA mutation carriers? | Risk management options addressed in decision aid                                                                                                                         | Format of decision aid                                                                           | Decision aid Language | Presenta tion of risks and benefits in DA                                                                                                                                                                                                     | Separate sections for BRCA1 & BRCA2 mutation carriers?                                                | Decision aid facilitate s users to work through their values? | Patient & Public Involvement (PPI) in decision aid development? | Efficacy of decision aid on decision related & other relevant outcomes reported ? | DA provides recomme ndation for which option(s) the patient should choose? | Intended moment(s) of use of DA          |
|------------------------------|---------|---------------------------------------------------------------------------------------------------------------------------|--------------------------------------------------------------------------------------------------|-----------------------------------------------------|---------------------------------------------------------------------------------------------------------------------------------------------------------------------------|--------------------------------------------------------------------------------------------------|-----------------------|-----------------------------------------------------------------------------------------------------------------------------------------------------------------------------------------------------------------------------------------------|-------------------------------------------------------------------------------------------------------|---------------------------------------------------------------|-----------------------------------------------------------------|-----------------------------------------------------------------------------------|----------------------------------------------------------------------------|------------------------------------------|
| Armstrong 2005               | USA     | Individualized Survival Curves Improve Satisfaction with Cancer Risk Management Decisions in Women With BRCA1/2 Mutations | BRCA1 & BRCA2 mutation carriers without OC or metastatic BC & significant residual BC or OC risk | Yes                                                 | <b>Breast:</b><br><br>Screening<br><br>Prophylactic mastectomy;<br><br>Chemopreven tion (tamoxifen, raloxifene)<br><br><b>Ovarian:</b><br><br>Prophylactic oophorectom y; | Paper<br><br>Binder containin g survival & cancer incidence curves printed on transluce nt paper | English               | Graphic presentat ion of cancer risks and risk reduction s with the various options by means of individual ized overall survival curves, and individual ized breast cancer incidence curves for alternativ e manage ment options and combinat | Risk estimates are individual ised therefore it is likely that BRCA 1/2 status is taken into account. | Not reported                                                  | Not reported                                                    | Yes<br>See table 2                                                                | No                                                                         | Mainly self-administer ed<br>By patient. |

|                                                         |           |                                                                                                             |                                                                                              |    |                                                                                                                                                                                          |               |         |                                                                                                                                                        |    |    |         |                                                                                                  |    |                              |
|---------------------------------------------------------|-----------|-------------------------------------------------------------------------------------------------------------|----------------------------------------------------------------------------------------------|----|------------------------------------------------------------------------------------------------------------------------------------------------------------------------------------------|---------------|---------|--------------------------------------------------------------------------------------------------------------------------------------------------------|----|----|---------|--------------------------------------------------------------------------------------------------|----|------------------------------|
|                                                         |           |                                                                                                             |                                                                                              |    |                                                                                                                                                                                          |               |         | ions of options.                                                                                                                                       |    |    |         |                                                                                                  |    |                              |
| Centre for Genetics Education NSW Health (2017)         | Australia | Surgery to Reduce the Risk of Ovarian Cancer Information for Women at Increased Risk                        | women at increased risk of ovarian cancer                                                    | No | <b>Ovarian:</b><br>RR-BSO (main focus)                                                                                                                                                   | Paper booklet | English | Graph showing baseline OC risk at various ages according to family hx of OC, BRCA or Lynch syndrome status<br><br>Text description of risks & benefits | No | No | Unclear | Unclear<br><br><i>? An earlier version of this DA appears to have been tested in Tiller 2006</i> | No | Self-administered by patient |
| Centre for Genetics Education, NSW Health (2012 update) | Australia | Information for Women considering Preventive Mastectomy because of a strong family history of breast cancer | Women with a strong family hx of breast cancer who may be considering preventive mastectomy. | No | <b>Breast:</b><br>Risk-reducing mastectomy (main focus)<br><br>Following options addressed briefly:<br>Lifestyle behaviours<br><br>Screening/surveillance (mammography, MRI, ultrasound) | Paper booklet | English | Text description of risks and benefits                                                                                                                 | No | No | Yes     | Not reported                                                                                     | No | Self-administered by patient |

|              |                 |                                                                                                           |                                                                                                                                                                                                                                                                         |     |                                                                                                                                                                                                                                                        |               |                                          |                                                                                                                                                                                                                   |                                                                                                       |     |     |                                     |     |                                                              |
|--------------|-----------------|-----------------------------------------------------------------------------------------------------------|-------------------------------------------------------------------------------------------------------------------------------------------------------------------------------------------------------------------------------------------------------------------------|-----|--------------------------------------------------------------------------------------------------------------------------------------------------------------------------------------------------------------------------------------------------------|---------------|------------------------------------------|-------------------------------------------------------------------------------------------------------------------------------------------------------------------------------------------------------------------|-------------------------------------------------------------------------------------------------------|-----|-----|-------------------------------------|-----|--------------------------------------------------------------|
|              |                 |                                                                                                           |                                                                                                                                                                                                                                                                         |     | Chemoprevention (anastrozole)                                                                                                                                                                                                                          |               |                                          |                                                                                                                                                                                                                   |                                                                                                       |     |     |                                     |     |                                                              |
| Collins 2016 | Australia       | iPrevent®: a tailored, web-based, decision support tool for breast cancer risk assessment and management. | All women (including women at increased BC risk and known BRCA mutation carriers)<br><br>Age 18-70yrs<br>Without BC<br>Without RRM<br><br>Without mutation in cancer gene other than BRCA1/2<br><br>Without 'half' relatives with BC, OC, prostate or pancreatic cancer | No  | <b>Breast:</b><br>Screening (mammography, MRI)<br><br>Risk-reducing Medication (tamoxifen, raloxifene, anastrozole, exemestane)<br><br>risk-reducing mastectomy<br><br>premenopausal risk-reducing salpingo-oophorectomy<br><br>Lifestyle Modification | Web-based     | English                                  | Breast cancer risks & risk reductions presented as words, percentages, a visual scale or pictogram and graphs<br><br>risk management options appear are, tailored to the woman's risk category and her input data | Yes (indirectly)<br><br>BRCA 1 or BRCA2 status inputted by user & risk estimates tailored accordingly | No  | Yes | Reported in Lo 2018 (see table 2)   | No  | To be used collaboratively by healthcare providers and women |
| Harmsen 2018 | The Netherlands | A patient decision aid for risk-reducing surgery in premenopausal BRCA1/2                                 | BRCA1/2 mutation carriers who participate in a preference trial that compares                                                                                                                                                                                           | Yes | <b>Ovarian:</b><br><br>Risk-reducing salpingo-oophorectomy                                                                                                                                                                                             | Paper booklet | Dutch with English translation available | Shaded icon arrays to indicate % risk) and pie charts                                                                                                                                                             | Yes                                                                                                   | Yes | Yes | No Testing of final DA not reported | Yes | To be used in addition to face-to-face consultation          |

|                                                                                          |     |                                                             |                                                                                                                                                           |    |                                                                        |                                         |         |                                                                                                                                                                                                             |    |     |              |              |    |                              |
|------------------------------------------------------------------------------------------|-----|-------------------------------------------------------------|-----------------------------------------------------------------------------------------------------------------------------------------------------------|----|------------------------------------------------------------------------|-----------------------------------------|---------|-------------------------------------------------------------------------------------------------------------------------------------------------------------------------------------------------------------|----|-----|--------------|--------------|----|------------------------------|
|                                                                                          |     | mutation carriers:<br>Development process and pilot testing | RRSO with salpingectomy and delayed oophorectomy<br><br>Pre-menopausal, age 25-45 yrs, completed childbearing, not currently being treated for malignancy |    | Risk-reducing salpingectomy                                            |                                         |         | were used for risk communication. Text description of benefits & risks                                                                                                                                      |    |     |              |              |    |                              |
| Healthwise staff a (2020 update)<br><br>DA reviewed and content assessed as current 2023 | USA | Breast Cancer: What Should I Do if I'm at High Risk?        | Women at high risk for breast cancer                                                                                                                      | No | <b>Breast:</b> Screening/surveillance<br>RRM<br>BSO<br>Chemoprevention | Web-based (with option to print as pdf) | English | BC risks depicted using shaded icon arrays<br><br>Text description of benefits & risks<br><br>DA allows users to compare benefits and risks of 2 options side by side by selecting the options they want to | No | Yes | Not reported | Not reported | No | Self-administered by patient |

|                                                                                          |     |                                                                             |                                          |    |                        |                                         |         |                                                                                                                                                                                                                                                                                         |    |     |              |              |    |                              |
|------------------------------------------------------------------------------------------|-----|-----------------------------------------------------------------------------|------------------------------------------|----|------------------------|-----------------------------------------|---------|-----------------------------------------------------------------------------------------------------------------------------------------------------------------------------------------------------------------------------------------------------------------------------------------|----|-----|--------------|--------------|----|------------------------------|
|                                                                                          |     |                                                                             |                                          |    |                        |                                         |         | compare from a dropdown list                                                                                                                                                                                                                                                            |    |     |              |              |    |                              |
| Healthwise staff b (2020 update)<br><br>DA reviewed and content assessed as current 2023 | USA | Ovarian Cancer: Should I Have My Ovaries Removed to Prevent Ovarian Cancer? | Women who at high risk of ovarian cancer | No | Ovarian: BSO Screening | Web-based (with option to print as pdf) | English | Test Description of baseline OC risks for women with 1 or 2 first degree relatives with OC and for BRCA mutation carriers<br><br>Text description of benefits and risks of BSO<br><br>DA allows users to compare the benefits and risks of the 2 options (BSO, no surgery) side by side | No | Yes | Not reported | Not reported | No | Self-administered by patient |

|              |     |                                                                                               |                                                                                               |     |                                                                                                                                                                                                                                                                                             |                       |         |                                                                                                                |                                                                                                                                       |     |     |                                                           |                                                                                                               |                                                                                                                  |
|--------------|-----|-----------------------------------------------------------------------------------------------|-----------------------------------------------------------------------------------------------|-----|---------------------------------------------------------------------------------------------------------------------------------------------------------------------------------------------------------------------------------------------------------------------------------------------|-----------------------|---------|----------------------------------------------------------------------------------------------------------------|---------------------------------------------------------------------------------------------------------------------------------------|-----|-----|-----------------------------------------------------------|---------------------------------------------------------------------------------------------------------------|------------------------------------------------------------------------------------------------------------------|
| Jabaley 2020 | USA | Development and Testing of a Decision Aid for Unaffected Women with a BRCA1 or BRCA2 Mutation | BRCA 1/2 mutation carriers without a personal history of breast or ovarian cancer 'previvors' | Yes | <b>Breast:</b><br><br>Surveillance /Screening ((Breast self-exam, Clinical breast exam, , MRI, Mammography )<br><br>Prophylactic Mastectomy<br><br>Chemoprevention (tamoxifen, raloxifene)<br><br><b>Ovarian:</b><br><br>Screening (TVU, CA125)<br><br>Prophylactic Oophorectomy<br><br>OCP | Paper/ electronic pdf | English | Bar charts depicting cancer risks<br><br>Text description & tables showing risks & benefits                    | No but cancer risks and recommended ages for ovarian risk management options reported separately for BRCA1 & BRCA2 mutation carriers. | Yes | Yes | Yes (information related outcomes only)- see table 2.     | No                                                                                                            | Intended to be Initially initiated by clinicians (designed with the possibility of being initiated by patients). |
| Kaufman 2003 | USA | Development of an Interactive Decision Aid for Female BRCA1/BRCA2 Carriers                    | BRCA1 & BRCA2 mutation carriers                                                               | Yes | <b>Breast:</b><br><br>Screening (Breast self-exam, Clinical breast exam, Mammography )<br><br>Chemoprevention (tamoxifen, raloxifene)                                                                                                                                                       | CD-Rom                | English | Text description of risks & benefits<br><br>Risks portrayed using bar charts (eg. depicting cumulative BC risk | Yes                                                                                                                                   | Yes | Yes | Yes Reported in Schwartz 2009 & Hooker 2011 (see table 2) | Partly<br><br>During the 'decision task' activity, the highest preference score indicates the risk management | Self-administered by patient to be used in addition to comprehensive genetic counselling sessions                |

|                                               |         |                                                                                                                                      |                                                                                |     |                                                                                                                                                                                    |                                         |         |                                                                                                                                                                     |     |     |     |    |                                                                                                            |                                                                             |
|-----------------------------------------------|---------|--------------------------------------------------------------------------------------------------------------------------------------|--------------------------------------------------------------------------------|-----|------------------------------------------------------------------------------------------------------------------------------------------------------------------------------------|-----------------------------------------|---------|---------------------------------------------------------------------------------------------------------------------------------------------------------------------|-----|-----|-----|----|------------------------------------------------------------------------------------------------------------|-----------------------------------------------------------------------------|
|                                               |         |                                                                                                                                      |                                                                                |     | Prophylactic mastectomy<br><br><b>Ovarian: <i>not main focus</i></b><br><br>Screening (CA-125, transvaginal ultrasound)<br><br>Oral contraceptives<br><br>Prophylactic oophrectomy |                                         |         | to age 50 and age 70)                                                                                                                                               |     |     |     |    | ment option that is most consistent with the values and preferences the woman entered in the decision task |                                                                             |
| Kautz-Freimuth 2021<br><br>DA (A) 'Previvors' | Germany | Development of decision aids for female BRCA1 and BRCA2 mutation carriers in Germany to support preference-sensitive decision-making | BRCA1/2 mutation carriers (in Germany) without a history of cancer (previvors) | Yes | Intensive breast cancer screening<br><br>Risk-reducing bilateral mastectomy:<br><br>Risk-reducing salpingo-oophrectomy                                                             | Paper brochure & electronic pdf version | Germany | Reported only briefly<br><br>Average risks of breast cancer and ovarian cancer each subdivided into BRCA1 and BRCA2 mutations<br><br>Lifetime, age and time-related | Yes | Yes | Yes | No | No                                                                                                         | To be used in post-test genetic counselling and given to women to take home |

|  |  |  |  |  |  |  |  |                                                                                                                                             |  |  |  |  |  |  |
|--|--|--|--|--|--|--|--|---------------------------------------------------------------------------------------------------------------------------------------------|--|--|--|--|--|--|
|  |  |  |  |  |  |  |  | (10 year) risks                                                                                                                             |  |  |  |  |  |  |
|  |  |  |  |  |  |  |  | Personal risk of breast cancer and ovarian cancer                                                                                           |  |  |  |  |  |  |
|  |  |  |  |  |  |  |  | Effect of RRM on risk of developing breast cancer                                                                                           |  |  |  |  |  |  |
|  |  |  |  |  |  |  |  | Effect of BSO on risk of developing ovarian cancer & survival<br><i>-unclear if test descriptions, graphic depictions or both were used</i> |  |  |  |  |  |  |
|  |  |  |  |  |  |  |  | pros/cons, overview table of each intervention                                                                                              |  |  |  |  |  |  |



|                                 |         |                                                                                                        |                                                                                                                                                                                                                        |     |                                                                                                                                                                                                 |                                          |                                          |                                                                                         |                                 |                                 |                                 |                                          |                                 |                                                                                                               |
|---------------------------------|---------|--------------------------------------------------------------------------------------------------------|------------------------------------------------------------------------------------------------------------------------------------------------------------------------------------------------------------------------|-----|-------------------------------------------------------------------------------------------------------------------------------------------------------------------------------------------------|------------------------------------------|------------------------------------------|-----------------------------------------------------------------------------------------|---------------------------------|---------------------------------|---------------------------------|------------------------------------------|---------------------------------|---------------------------------------------------------------------------------------------------------------|
| Krassuski 2021                  | Germany | Decision Aids for Preventive Treatment Alternatives for BRCA1/2 Mutation Carriers: a Systematic Review | Decision aids applicable to BRCA mutation carriers                                                                                                                                                                     | NA  | Various- see individual included studies                                                                                                                                                        | Various- see individual included studies | Various- see individual included studies | Various- see individual included studies                                                | see individual included studies | see individual included studies | see individual included studies | Not Reported                             | see individual included studies | see individual included studies                                                                               |
| Kurian 2012                     | USA     | Online Tool to Guide Decisions for BRCA1/2 Mutation Carriers                                           | female <i>BRCA1/2</i> mutation carriers unaffected by cancer<br><br>Age 25-69 yrs<br><br>Who have NOT undergone breast screening, risk-reducing breast or ovarian surgery and have NOT taken risk-reducing medication. | Yes | <b>Breast:</b><br><br>Screening (mammogram, MRI, both)<br><br>Prophylactic mastectomy (at various ages).<br><br><b>Breast &amp; Ovarian:</b><br><br>Prophylactic oophrectomy (at various ages). | Web-based                                | English                                  | Outcomes shown in decision aid are shown as bar charts & % probability of each outcome. | Yes                             | No                              | Not reported                    | Reported in Schackman 2013 (see table 2) | No                              | Designed for joint use by <u>cancer unaffected</u> women with BRCA mutations and their health care providers. |
| Mayo Clinic Staff (2020 update) | USA     | Prophylactic oophorectomy: Preventing cancer by surgically removing your ovaries.                      | women at high risk of ovarian cancer (including BRCA mutation carriers & those with Lynch syndrome)                                                                                                                    | No  | <b>Breast &amp; Ovarian:</b><br>BSO (main focus)<br><br>Screening for OC, RRM and OCP mentioned briefly as alternatives                                                                         | Web-based                                | English                                  | Text description of risks and benefits                                                  | No                              | No                              | Not reported                    | Not reported                             | No                              | Appears self-administered                                                                                     |

|                                 |        |                                                                                                                  |                                                                                |     |                                                                                                                                                                                                |               |         |                                                                                                                       |              |     |              |                                                                                                                                                                                                                      |    |                                                                                          |
|---------------------------------|--------|------------------------------------------------------------------------------------------------------------------|--------------------------------------------------------------------------------|-----|------------------------------------------------------------------------------------------------------------------------------------------------------------------------------------------------|---------------|---------|-----------------------------------------------------------------------------------------------------------------------|--------------|-----|--------------|----------------------------------------------------------------------------------------------------------------------------------------------------------------------------------------------------------------------|----|------------------------------------------------------------------------------------------|
| Mayo Clinic Staff (2021 update) | USA    | Preventive (prophylactic) mastectomy: Surgery to reduce breast cancer risk                                       | Women at high risk of breast cancer (both cancer unaffected & cancer affected) | No  | RRM (bilateral & contralateral) - <i>main focus</i><br><br>Following options also mentioned briefly:<br><br>Chemoprevention<br><br>Breast cancer screening<br><br>BSO<br><br>Healthy lifestyle | Web-based     | English | Text description of risks & benefits                                                                                  | No           | No  | Not reported | Not reported                                                                                                                                                                                                         | No | Appears self-administered                                                                |
| Metcalfe 2007                   | Canada | Development and testing of a decision aid for breast cancer prevention for women with a BRCA1 or BRCA2 mutation. | BRCA 1/2 mutation carriers unaffected by BC or OC                              | Yes | Preventive Mastectomy<br>Preventive salpingo-oophrectomy before age 50<br>Tamoxifen for 5 years<br><br>Breast screening                                                                        | Paper booklet | English | Probabilistic information on likelihood of benefits and risks of each option depicted using text & shaded icon arrays | Not Reported | Yes | Yes          | Yes<br><br>Use of the decision aid decreased decisional conflict, increased knowledge levels & decreased uncertainty about each option<br><br>Efficacy tested further in RCT reported in Metcalfe 2017 (see table 2) | No | Self-administered<br><br>designed to be used in addition to standard genetic counselling |

|                              |           |                                                                                                                          |                                                                      |    |                                                                                                                 |                                                  |         |                                                                                                    |              |     |     |                                                       |              |                                                                                                                                                                     |
|------------------------------|-----------|--------------------------------------------------------------------------------------------------------------------------|----------------------------------------------------------------------|----|-----------------------------------------------------------------------------------------------------------------|--------------------------------------------------|---------|----------------------------------------------------------------------------------------------------|--------------|-----|-----|-------------------------------------------------------|--------------|---------------------------------------------------------------------------------------------------------------------------------------------------------------------|
| NICE 2017 (Pre-menopausal )  | UK        | Taking tamoxifen to reduce the chance of developing breast cancer<br>Decision aid for premenopausal women at high risk   | Pre-menopausal women at high risk of breast cancer<br>BC unaffected  | No | Risk-reducing medication (Tamoxifen for 5 years)                                                                | Paper (pdf)                                      | English | Yes<br><br>Risks and benefits of each option displayed in tabular form & using shaded icon arrays. | No           | Yes | Yes | Not reported                                          | No           | Intended to be used in conjunction with healthcare professionals within secondary care or specialist genetic clinics, who have expertise in familial breast cancer. |
| NICE 2017 (Post-menopausal ) | UK        | Taking a medicine to reduce the chance of developing breast cancer<br>Decision aid for postmenopausal women at high risk | Post-menopausal women at high risk of breast cancer<br>BC unaffected | No | Risk-reducing medication:<br><br>Anastrozole for 5 years<br><br>Raloxifene for 5 years<br>Tamoxifen for 5 years | Paper (pdf)                                      | English | Yes<br><br>Risks and benefits of each option displayed in tabular form & using shaded icon arrays. | No           | Yes | Yes | Not reported                                          | No           | Intended to be used in conjunction with healthcare professionals within secondary care or specialist genetic clinics, who have expertise in familial breast cancer. |
| TILLER 2003 (updated 2008)   | Australia | A decision aid for women at increased risk for ovarian cancer.                                                           | Women at increased risk of ovarian cancer                            | No | Watchful waiting<br><br>Screening<br><br>Use of OCP                                                             | Paper booklet with separate values clarification | English | Text description of benefits & risks                                                               | Not reported | Yes | Yes | Yes<br><br>Pilot testing of the DA with at-risk women | Not reported | Self-administered                                                                                                                                                   |

|                                                                  |                 |                                                          |                                            |    |                                                        |                            |         |                                                                                              |              |     |     |                                                                                                                                                                                                                                                                             |                                     |                                      |
|------------------------------------------------------------------|-----------------|----------------------------------------------------------|--------------------------------------------|----|--------------------------------------------------------|----------------------------|---------|----------------------------------------------------------------------------------------------|--------------|-----|-----|-----------------------------------------------------------------------------------------------------------------------------------------------------------------------------------------------------------------------------------------------------------------------------|-------------------------------------|--------------------------------------|
| Overlaps with Centre for Genetics Education NSW Health (2017) DA |                 |                                                          |                                            |    | Prophylactic oophorectomy                              | on exercise                |         | Numerical information on risk reduction of different options provided as % reduction of risk |              |     |     | attending a familial cancer clinic demonstrated women reported that the decision aid had increased their knowledge, led to more accurate expectations of benefits and risks, assisted them in arriving at a decision, and reduced their decisional conflict and uncertainty |                                     |                                      |
| Unic 1998                                                        | The Netherlands | Assessment of the Time-trade off Values for Prophylactic | Healthy women suspected or known to have a | No | Prophylactic mastectomy<br><br>Breast cancer screening | Paper brochure & videotape | Unclear | Text description & some risks &                                                              | Not reported | Yes | Yes | Yes (see table 2)<br><br>Reported in Stalmeier                                                                                                                                                                                                                              | No*<br><br>*Advice based on women's | DA informational material viewed and |

|                        |                 | Mastectomy of Women with a Suspected Genetic Predisposition to Breast Cancer                     | genetic predisposition to breast cancer         |                                                                                                                                                    |                                                                                                                         | (provided as part of a Shared Decision Making Program (SDMP)) |       | benefits explained through interviews in the video <sup>§</sup><br><br><i>§full details not reported in article.</i>                                                                                                         |    |              |     | 1999 (see table 2)                                                                                    | <i>preferences subsequently given by clinicians as part of the wider SDMP</i> | read at home-provided as part of a Shared Decision Making Program (SDMP)                                                        |
|------------------------|-----------------|--------------------------------------------------------------------------------------------------|-------------------------------------------------|----------------------------------------------------------------------------------------------------------------------------------------------------|-------------------------------------------------------------------------------------------------------------------------|---------------------------------------------------------------|-------|------------------------------------------------------------------------------------------------------------------------------------------------------------------------------------------------------------------------------|----|--------------|-----|-------------------------------------------------------------------------------------------------------|-------------------------------------------------------------------------------|---------------------------------------------------------------------------------------------------------------------------------|
| VANROOSMALEN BJC 2004a | The Netherlands | Randomised trial of a decision aid and its timing for women being tested for a BRCA1/2 mutation. | Women undergoing testing for a BRCA1/2 mutation | No<br><br>(Designed for women undergoing genetic testing therefore participants are not necessarily aware of their BRCA status at the time of use) | Breast cancer screening<br><br>Prophylactic mastectomy<br><br>Ovarian cancer screening<br><br>Prophylactic oophorectomy | Paper brochure and video                                      | Dutch | Yes<br><br>Text description of benefits & risks of each option in qualitative terms & where possible in quantitative terms<br><br>Video portrayed consequences of the options through interviews with BRCA mutation carriers | No | Not reported | Yes | Yes (see table 2)<br><br>Additional efficacy testing reported in VANROOSMALEN JCO 2004b (see table 2) | No                                                                            | brochure and video to be viewed at home.<br><br>DA is considered suitable for use either before or after a genetic test result. |

|                        |                 |                                                                                                                                                            |                                                                                                                                   |     |                                                                                                                                                             |                                            |       |                                                                                                                                                                                                                                              |         |     |              |                   |         |                                                                                                          |
|------------------------|-----------------|------------------------------------------------------------------------------------------------------------------------------------------------------------|-----------------------------------------------------------------------------------------------------------------------------------|-----|-------------------------------------------------------------------------------------------------------------------------------------------------------------|--------------------------------------------|-------|----------------------------------------------------------------------------------------------------------------------------------------------------------------------------------------------------------------------------------------------|---------|-----|--------------|-------------------|---------|----------------------------------------------------------------------------------------------------------|
|                        |                 |                                                                                                                                                            |                                                                                                                                   |     |                                                                                                                                                             |                                            |       | Photographs showed results of prophylactic mastectomy                                                                                                                                                                                        |         |     |              |                   |         |                                                                                                          |
| VANROOSMALEN JCO 2004b | The Netherlands | Randomized Trial of a Shared Decision-Making Intervention Consisting of Trade-Offs and Individualized Treatment Information for BRCA1/2 Mutation Carriers. | BRCA 1/2 mutation carriers (both BC or OC affected or unaffected) without distant metastasis, had not undergone both RRM & RR-BSO | Yes | <b>Breast:</b><br>Breast Cancer screening<br><br>Prpphylactic mastectomy<br><br><b>Ovarian:</b><br>Ovarian cancer screening<br><br>Prophylactic oophrectomy | Face to face and telephone TTO interviews. | Dutch | individualized treatment information was shared with the women using two bar charts, one for life expectancy (LE) and one for quality-adjusted life expectancy (QALE). The bar charts presented the treatment options relative to each other | Unclear | Yes | Not reported | Yes (see table 2) | Unclear | Interview administered by a research assistant<br><br>Subsequent to use (at home) of an informational DA |

|                                   |    |                                                |                                           |    |                                                                      |                   |         |                                                                                                                                                                                                    |                                                                                                                        |     |     |              |    |                                              |
|-----------------------------------|----|------------------------------------------------|-------------------------------------------|----|----------------------------------------------------------------------|-------------------|---------|----------------------------------------------------------------------------------------------------------------------------------------------------------------------------------------------------|------------------------------------------------------------------------------------------------------------------------|-----|-----|--------------|----|----------------------------------------------|
| Witt 2014<br>(Cardiff University) | UK | Ovdex<br>The Oophorectomy Decision Explorer v5 | Women at increased risk of ovarian cancer | No | BSO (main focus)<br><br>OCP & lifestyle behaviours briefly mentioned | Web-based booklet | English | OC risks & complications/side effects of BSO displayed using shaded icon arrays and text description<br><br>Benefits and risks of the 2 options (BSO, no surgery) compared side by side in a table | Unclear<br>mentions that information can be personalised by answering 3 questions on linked website (no longer in use) | Yes | Yes | Not reported | No | Self-administered by patient?<br><br>Unclear |
|-----------------------------------|----|------------------------------------------------|-------------------------------------------|----|----------------------------------------------------------------------|-------------------|---------|----------------------------------------------------------------------------------------------------------------------------------------------------------------------------------------------------|------------------------------------------------------------------------------------------------------------------------|-----|-----|--------------|----|----------------------------------------------|
