# Supplementary material
Source: HighWire-hosted journal article supplement (https://bmjopen.bmj.com/content/14/6/e076876)
Supplement: inline-supplementary-material-4 [file inline-supplementary-material-4.pdf]

| Author & Year  | Decision aid evaluated | Country | Study design                             | Participants & sample size                                                                                                                                                                                                                                                                                     | Did any participants have a personal history of breast or ovarian cancer?                           | Intervention                                                                                                                                                                                                                                                                                                           | Comparator                                                                                                                                                                                                                                          | Outcomes evaluated                                                                                                                                                         | Outcome assessment methods                                                                                                                                                                                                                                                                                                                                                                                                                                                                                         | Main Results                                                                                                                                                                                                                                                                                                                                                                                                                                                                                                                |
|----------------|------------------------|---------|------------------------------------------|----------------------------------------------------------------------------------------------------------------------------------------------------------------------------------------------------------------------------------------------------------------------------------------------------------------|-----------------------------------------------------------------------------------------------------|------------------------------------------------------------------------------------------------------------------------------------------------------------------------------------------------------------------------------------------------------------------------------------------------------------------------|-----------------------------------------------------------------------------------------------------------------------------------------------------------------------------------------------------------------------------------------------------|----------------------------------------------------------------------------------------------------------------------------------------------------------------------------|--------------------------------------------------------------------------------------------------------------------------------------------------------------------------------------------------------------------------------------------------------------------------------------------------------------------------------------------------------------------------------------------------------------------------------------------------------------------------------------------------------------------|-----------------------------------------------------------------------------------------------------------------------------------------------------------------------------------------------------------------------------------------------------------------------------------------------------------------------------------------------------------------------------------------------------------------------------------------------------------------------------------------------------------------------------|
| Armstrong 2005 | Armstrong 2005         | USA     | Double-blind randomised controlled trial | Women with BRCA1/2 mutations (n = 32)<br>Women were excluded if they did not have significant residual breast or ovarian cancer risk (ie, they had already undergone both bilateral oophorectomy and bilateral mastectomy).<br><br>women were excluded if they had ovarian cancer or metastatic breast cancer. | Yes<br><br>48% of participants had been diagnosed with breast cancer before undergoing BRCA testing | one-on-one meeting with research study coordinator that included a structured review of an educational booklet containing information about the cancer risks associated with BRCA1/2 mutations and the alternative management options<br><br>PLUS Individualised decision support system (DSS) printouts<br><br>n = 13 | one-on-one meeting with research study coordinator that included a structured review of an educational booklet containing information about the cancer risks associated with BRCA1/2 mutations and the alternative management options<br><br>n = 14 | <i>Primary outcome:</i> decision satisfaction.<br><br><i>Secondary outcomes:</i> perceptions of cancer risk, anxiety & depression, and behaviour & behavioural intentions. | <i>Decision satisfaction</i> measured with 12-item scale that combined items from the Decisional Conflict Scale with the Satisfaction With Decision Scale.<br><br><i>Perceptions of cancer risk</i> measured using the same survey items as the baseline assessment.<br><br><i>Anxiety</i> measured with the Intrusion Subscale of the RIES and the Hopkins Symptom Checklist<br><br><i>Management decisions</i> assessed by asking participants to select the decision that best matched their current situation. | 27 women completed a 6-week follow-up.<br><br>Women in the intervention arm reported significantly higher decision satisfaction at follow-up than women in the control arm (p <.0005).<br><br>The effect of the DSS was greater among women with low cancer anxiety at baseline than women with high cancer anxiety at baseline (P = .01 for interaction).<br><br>DSS did not significantly alter cancer anxiety at follow-up, perceptions of cancer risk given alternative management strategies, or management decisions. |

|             |              |     |                                                                                                                                       |                                                                                                                                                                           |                                                                                                                                      |                                             |                           |                                                                                                                                                                                         |                                                                                                                                                                                                                                                                                                                                                                                                                                                                                                                                                                              |                                                                                                                                                                                                                                                                                                                                                                                                                                                                                                                                                                                                                                                                                                                                               |
|-------------|--------------|-----|---------------------------------------------------------------------------------------------------------------------------------------|---------------------------------------------------------------------------------------------------------------------------------------------------------------------------|--------------------------------------------------------------------------------------------------------------------------------------|---------------------------------------------|---------------------------|-----------------------------------------------------------------------------------------------------------------------------------------------------------------------------------------|------------------------------------------------------------------------------------------------------------------------------------------------------------------------------------------------------------------------------------------------------------------------------------------------------------------------------------------------------------------------------------------------------------------------------------------------------------------------------------------------------------------------------------------------------------------------------|-----------------------------------------------------------------------------------------------------------------------------------------------------------------------------------------------------------------------------------------------------------------------------------------------------------------------------------------------------------------------------------------------------------------------------------------------------------------------------------------------------------------------------------------------------------------------------------------------------------------------------------------------------------------------------------------------------------------------------------------------|
| Hooker 2011 | Kaufman 2003 | USA | Randomized controlled trial nested within a larger observational study assessing the outcomes of BRCA1/2 testing.<br><br>Longitudinal | Female BRCA1/2 mutation carriers (aged 21–75 years)<br><br>who had not had prior bilateral mastectomy and did not have metastatic breast or ovarian cancer<br><br>n = 214 | Yes<br><br>37% were affected with breast cancer and 10% with ovarian cancer (mean time since diagnosis of either cancer = 7.7 years) | Usual care plus decision aid (DA) (n = 100) | Usual care (UC) (n = 114) | General distress<br><br>Cancer-specific distress<br><br>Genetic testing–specific distress<br><br>Management intentions & behaviours<br><br>at 1-, 6-, and 12-months post-randomization. | <i>General distress:</i> 12-item Brief Symptom Inventory (BSI) instrument (Likert scale)<br><br><i>Cancer-specific distress:</i> 15-item Impact of Event Scale (IES) instrument (Likert-style)<br><br><i>Genetic testing distress:</i> 25-item scale<br>Multidimensional Impact of Cancer Risk Assessment Questionnaire (MICRA)<br><br><i>Management decision:</i> asked participants, “Have you made a final decision about how to manage your risk for breast cancer?” & asked participants whether they had obtained a risk-reducing mastectomy since previous assessment | Of the 100 DA participants included in study, 36 (36%) reported that they did not use the DA. Analyses to evaluate the impact of the DA among individuals who reported using it (n = 64).<br><br><b>DA users analysis:</b><br><br>Identified different distress trajectories in the DA and the UC groups<br><br>cancer-specific and genetic testing–specific distress adjusted for baseline levels were greater among the DA group at 1 month post-randomization (P = 0.009 and 0.04, respectively)<br><br>individuals in the DA group who viewed the DA reported significantly lower genetic testing–specific distress 12 months post-randomization than did the UC group (P = 0.03)<br><br>DA use was not associated with general distress. |
|-------------|--------------|-----|---------------------------------------------------------------------------------------------------------------------------------------|---------------------------------------------------------------------------------------------------------------------------------------------------------------------------|--------------------------------------------------------------------------------------------------------------------------------------|---------------------------------------------|---------------------------|-----------------------------------------------------------------------------------------------------------------------------------------------------------------------------------------|------------------------------------------------------------------------------------------------------------------------------------------------------------------------------------------------------------------------------------------------------------------------------------------------------------------------------------------------------------------------------------------------------------------------------------------------------------------------------------------------------------------------------------------------------------------------------|-----------------------------------------------------------------------------------------------------------------------------------------------------------------------------------------------------------------------------------------------------------------------------------------------------------------------------------------------------------------------------------------------------------------------------------------------------------------------------------------------------------------------------------------------------------------------------------------------------------------------------------------------------------------------------------------------------------------------------------------------|

|                          |                                   |         |                                                                                                                                                                                             |                                                                                                                                                                                                                                     |     |                             |                                  |                                                                                                                                                                                      |                                              |                                                                                                                                                                                                                                 |
|--------------------------|-----------------------------------|---------|---------------------------------------------------------------------------------------------------------------------------------------------------------------------------------------------|-------------------------------------------------------------------------------------------------------------------------------------------------------------------------------------------------------------------------------------|-----|-----------------------------|----------------------------------|--------------------------------------------------------------------------------------------------------------------------------------------------------------------------------------|----------------------------------------------|---------------------------------------------------------------------------------------------------------------------------------------------------------------------------------------------------------------------------------|
| Jabaley 2020<br><br>24 3 | Jabaley 2020                      | USA     | Pilot study using surveys to assess DA for organization, clarity, usefulness, comprehensiveness, ease of understanding, and relevance to the cancer risk management decision-making process | Convenience sample of unaffected BRCA mutation carriers (n = 15) and healthcare professionals (n = 8)                                                                                                                               | No  | Prototype DA                | NA                               | Rate DA for:<br><br>Organization, clarity, usefulness, comprehensiveness, ease of understanding<br><br>relevance to the cancer risk management decision-making process of previvors. | Surveys containing 11 Likert scale items     | Mean scores were 3 or higher on Likert scales of 1–4 (high) for each of the 11 items.<br><br>Most end users reported that the decision aid increased their knowledge and was useful in sharing information with family members. |
| Krassuski 2019           | Systematic review of multiple DAs | Germany | Systematic review                                                                                                                                                                           | Included original studies evaluating effectiveness of DA for known BRCA mutation carriers aged 18 to 75<br><br>Six studies included:<br><br><i>Armstrong 2005</i> RCT-PARALLEL GROUP<br><br><i>Schwartz 2009</i> RCT-PARALLEL GROUP | Yes | DA (see individual studies) | Various (see individual studies) | Decision related outcomes<br><br>Information related outcomes<br><br>Actual preventive choice<br><br>Health outcomes                                                                 | Various instruments (see individual studies) | Female BRCA mutation carriers using a DA had less decisional conflict, were more likely to reach a decision and were more satisfied with their decision                                                                         |

|                 |                         |           |                                                                |                                                                                                                                                                                                                                       |    |                                                                                                                                                                                                                                               |                                                                                |                                                      |                                                                                                                                                                                                                                                                                                                                       |                                                                                                                                                                                                                                                                                                                                                      |
|-----------------|-------------------------|-----------|----------------------------------------------------------------|---------------------------------------------------------------------------------------------------------------------------------------------------------------------------------------------------------------------------------------|----|-----------------------------------------------------------------------------------------------------------------------------------------------------------------------------------------------------------------------------------------------|--------------------------------------------------------------------------------|------------------------------------------------------|---------------------------------------------------------------------------------------------------------------------------------------------------------------------------------------------------------------------------------------------------------------------------------------------------------------------------------------|------------------------------------------------------------------------------------------------------------------------------------------------------------------------------------------------------------------------------------------------------------------------------------------------------------------------------------------------------|
|                 |                         |           |                                                                | <i>Hooker 2011</i> RCT- PARALLEL GROUP<br><br><i>Metcalfe 2017</i> RCT- PARALLEL GROUP<br><br><i>VanRoosmale n 2004</i> -RCT CROSS-OVER TRIAL<br><br><i>Metcalfe 2007</i> -One group pretest- posttest study.                         |    |                                                                                                                                                                                                                                               |                                                                                |                                                      |                                                                                                                                                                                                                                                                                                                                       |                                                                                                                                                                                                                                                                                                                                                      |
| Lo et al (2018) | iPrevent (Collins 2016) | Australia | Pilot study to assess usability & acceptability of iPrevent DA | <p>Stage 1: Pilot test (n=10 patients with prior risk assessment attending a Breast and Ovarian Cancer Risk Management Clinic)</p> <p>Stage 2: Patients &amp; clinicians from a mix of hospital &amp; primary care settings (n=20</p> | No | <p>Stage 1: Patients used iPrevent under the supervision of a research assistant &amp; were emailed resulting report</p> <p>Stage 2: Clinicians were first familiarized with iPrevent using hypothetical paper-based cases and then actor</p> | BC worry, anxiety, risk perception & knowledge pre- and 2 weeks post-iPrevent. | Usability BC worry anxiety risk perception knowledge | <p><i>Usability</i>: 10 item (Likert scale) System Usability Scale (SUS)</p> <p><i>Acceptability</i>: 9 item acceptability questionnaire</p> <p><i>BC worry</i>: 3 item Lerman BC worry scale</p> <p><i>Anxiety</i>: 6 item State-Trait Anxiety Inventory</p> <p>Risk perception: single item asks patients to rate their BC risk</p> | <p>Usability rated above average (SUS score &gt;68) for 68% clinicians and 76% patients.</p> <p>Amount of information provided by iPrevent was reported as “about right” by 89% clinicians and 89% patients</p> <p>95% clinicians and 97% patients would recommend iPrevent to others,</p> <p>53% clinicians and 27% patients found it too long.</p> |

|               |               |        |                                |                                                                                                                                                                                                                                  |    |                                                                                                                                         |                                    |                                                                                                                                                                                                                                                                               |                                                                                                                                                                                                                                                                    |                                                                                                                                                                                                                                           |
|---------------|---------------|--------|--------------------------------|----------------------------------------------------------------------------------------------------------------------------------------------------------------------------------------------------------------------------------|----|-----------------------------------------------------------------------------------------------------------------------------------------|------------------------------------|-------------------------------------------------------------------------------------------------------------------------------------------------------------------------------------------------------------------------------------------------------------------------------|--------------------------------------------------------------------------------------------------------------------------------------------------------------------------------------------------------------------------------------------------------------------|-------------------------------------------------------------------------------------------------------------------------------------------------------------------------------------------------------------------------------------------|
|               |               |        |                                | clinicians & n = 33 patients)<br>Patients and clinicians were not selected according to their level of BC risk or prior experience with BC risk assessment.<br><br>Only 16% (n = 7) of included patients were at high risk of BC |    | scenarios; subsequently, they used iPrevent with their patients<br><br>Patients provided a printout of their iPrevent output via email. |                                    |                                                                                                                                                                                                                                                                               | category: "average," "somewhat increased," or "substantially increased"<br><br><i>Knowledge:</i> 16 item survey assessing knowledge regarding BC (11 items), risk-reducing medication (3 items), and risk-reducing mastectomy (2 items)                            | Exploratory analyses suggested that iPrevent could improve risk perception, decrease frequency of BC worry, and enhance BC prevention knowledge without changing state anxiety.                                                           |
| Metcalfe 2007 | Metcalfe 2007 | Canada | Pre-test/post-test pilot study | BRCA 1/2 mutation carriers who had not yet made their BC prevention decision<br><br>n =21 women completed pre-test questionnaire and n = 20 completed post-test questionnaire.                                                   | No | Decision aid                                                                                                                            | Outcomes Pre-test versus post-test | <i>Primary outcome:</i> decisional conflict<br><br><i>Other outcomes:</i> knowledge of BC prevention options, psychological distress, choice predisposition & acceptability.<br><br>Outcomes measured at two time points (prior to using DA & within 4 weeks after using DA). | <i>Decisional conflict:</i> 16 item Decisional Conflict Scale<br><br><i>Knowledge:</i> bespoke knowledge questionnaire<br><br><i>Choice predisposition:</i> choice predisposition tool<br><br><i>Cancer-specific distress:</i> 15 item Impact of Event Scale (IES) | Use of the decision aid decreased decisional conflict to levels suggestive of implementation of a decision. In addition, knowledge levels increased and choice predisposition changed with fewer women being uncertain about each option. |

|                     |               |        |                                           |                                                                                                                                                                                                                                                                |              |                              |            |                                                                                                                                                    |                                                                                                                                                                                                                                                                                                                      |                                                                                                                                                                                                                                                                                                                                                                                                       |
|---------------------|---------------|--------|-------------------------------------------|----------------------------------------------------------------------------------------------------------------------------------------------------------------------------------------------------------------------------------------------------------------|--------------|------------------------------|------------|----------------------------------------------------------------------------------------------------------------------------------------------------|----------------------------------------------------------------------------------------------------------------------------------------------------------------------------------------------------------------------------------------------------------------------------------------------------------------------|-------------------------------------------------------------------------------------------------------------------------------------------------------------------------------------------------------------------------------------------------------------------------------------------------------------------------------------------------------------------------------------------------------|
|                     |               |        |                                           |                                                                                                                                                                                                                                                                |              |                              |            |                                                                                                                                                    | Acceptability:<br>questionnaire<br>using open- and<br>closed-ended<br>questions                                                                                                                                                                                                                                      |                                                                                                                                                                                                                                                                                                                                                                                                       |
| Metcalfe<br>2017    | Metcalfe 2007 | Canada | Randomised<br>controlled<br>trial         | BRCA 1/2<br>mutation<br>carries age<br>25-60 years<br>with no<br>previous<br>cancer<br>diagnosis or<br>risk -reducing<br>surgery or<br>tamoxifen<br>use.<br><br>150<br>participants<br>recruited<br>(intervention<br>group n = 76,<br>control group<br>n = 74) | No           | Decision aid +<br>usual care | Usual care | <i>Primary outcome:</i><br>decisional conflict<br><br><i>Secondary outcomes:</i><br>cancer-related<br>distress, knowledge<br>& choice disposition. | <i>Decisional<br/>conflict:</i> 16 item<br>Decisional Conflict<br>Scale<br><br><i>Cancer-specific<br/>distress:</i> 15 item<br>Impact of Event<br>Scale (IES)<br><br><i>Knowledge:</i> 13<br>item bespoke<br>knowledge<br>questionnaire<br><br><i>Choice<br/>predisposition:</i><br>choice<br>predisposition<br>tool | Cancer-related distress<br>scores significantly<br>lower in intervention<br>group compared with<br>the control group at 6<br>months (P = 0.01) and at<br>12 months<br>postrandomization (P =<br>0.05).<br><br>Decisional conflict<br>( <i>primary outcome</i> )<br>scores declined over<br>time for both groups<br>and at no time were<br>there statistical<br>differences between the<br>two groups. |
| Schackman<br>n 2013 | Kurian 2012   | USA    | Feasibility &<br>usability pilot<br>study | BRCA1/2<br>mutation<br>carriers (n =<br>40) &<br>clinicians<br>involved in<br>their care (n<br>= 16)<br><br>Women with<br>BRCA1/2 had<br>not<br>undergone<br>PM, but                                                                                           | Not reported | Decision aid                 | None       | Usability of DA<br>Satisfaction with DA<br>Clinical relevance                                                                                      | <i>Usability:</i> 10-item<br>System Usability<br>Scale (SUS)<br><br><i>Satisfaction &amp;<br/>contribution to<br/>clinical care:</i> 8<br>item Center for<br>Healthcare<br>Evaluation<br>Provider<br>Satisfaction<br>Questionnaire<br>(CHCE-PSQ).                                                                    | Most patients and<br>clinicians rated the<br>decision tool highly on<br>usability scale (82.5 & 85<br>respectively out of a<br>possible 100 points),<br><br>Most patients and<br>clinicians stated that the<br>tool could improve<br>patient–physician<br>encounters,<br><br>Most patients and<br>clinicians expressed high                                                                           |

|                |              |                 |                                                                                                      |                                                                                                                                                                                                                                                |                                                                                         |                                             |                                                           |                                                                                                                                                                                    |                                                                                                                                                                                                                                                                                                                                                                                                   |                                                                                                                                                                                                                                                                                                                                                                                                                                                                            |
|----------------|--------------|-----------------|------------------------------------------------------------------------------------------------------|------------------------------------------------------------------------------------------------------------------------------------------------------------------------------------------------------------------------------------------------|-----------------------------------------------------------------------------------------|---------------------------------------------|-----------------------------------------------------------|------------------------------------------------------------------------------------------------------------------------------------------------------------------------------------|---------------------------------------------------------------------------------------------------------------------------------------------------------------------------------------------------------------------------------------------------------------------------------------------------------------------------------------------------------------------------------------------------|----------------------------------------------------------------------------------------------------------------------------------------------------------------------------------------------------------------------------------------------------------------------------------------------------------------------------------------------------------------------------------------------------------------------------------------------------------------------------|
|                |              |                 |                                                                                                      | those with prior PO were eligible.                                                                                                                                                                                                             |                                                                                         |                                             |                                                           |                                                                                                                                                                                    | Modified CHCE-PSQ used for patients.                                                                                                                                                                                                                                                                                                                                                              | overall satisfaction (4.28 & 4.38 respectively out of a possible 100 points, on a scale of 1–5).                                                                                                                                                                                                                                                                                                                                                                           |
| Schwartz 2009  | Kaufman 2003 | USA             | Randomised controlled trial nested within observational study evaluating outcomes of BRCA1/2 testing | Female BRCA1/BRCA2 mutation carriers aged 21–75 (n =214)<br><br>Who had not had prior bilateral mastectomy, and did not have metastatic BC or OC<br><br>randomised to Usual Care (UC; n=114) or Usual Care plus Decision Aid (DA; n=100) arms. | Yes<br><br>37% affected with BC and 10% with OC (mean time since diagnosis = 7.7 years) | DA + usual care                             | Usual care                                                | Decisional conflict<br><br>Decisional satisfaction<br><br>Final management decision<br><br>Receipt of risk reducing mastectomy<br><br>at 1-, 6-, and 12-months post randomisation. | <i>Decisional Conflict:</i> 16 item Decisional-Conflict Scale (DCS)<br><br><i>Decision Satisfaction:</i> 6-item Satisfaction With Decision Scale (SWD)<br><br><i>Management Decision:</i> Participants asked ‘Have you made a final decision about how to manage your risk for breast cancer?’ Y/N<br><br>Participants also asked whether they had obtained an RRM since the previous assessment. | DA effective among carriers who were initially undecided about BC risk management<br>Within this group, DA led to an increased likelihood of reaching a management decision (OR=3.09, 95% CI=1.62, 5.90; p< .001), decreased decisional conflict (B=-.46, z=-3.1, p<.002), and increased satisfaction (B=.27, z=3.1, p=0.002) compared to UC.<br><br>Among carriers who had already made a management decision by time of randomization, DA had no benefit relative to UC. |
| Stalmeier 1999 | Unic 1998    | The Netherlands | one-group pretest-posttest study                                                                     | Women with a family hx of BC (mixture of known BRCA mutation carriers, non-carriers & untested)                                                                                                                                                | No                                                                                      | DA (Shared Decision Making Program (SDMP)). | Outcomes compared in participants pre & post intervention | Decision uncertainty, decision burden, subjective knowledge, risk comprehension breast cancer concern,<br><br>desire to participate in the program,                                | <i>Decision uncertainty:</i> single item bespoke survey<br><br><i>Decision burden:</i> single item bespoke survey                                                                                                                                                                                                                                                                                 | Decision uncertainty (effect size d = 0.37) and decision burden (d= 0.41) were reduced by the SDMP.<br>Subjective knowledge and risk comprehension were improved. The women were satisfied with the SDMP and                                                                                                                                                                                                                                                               |

|                |                        |                 |                                                                                  |                                                        |     |                                                                                                           |                                                                    |                                                                                                                                |                                                                                                                                                                                                                                                                                                                                                                                                                                             |                                                                                                                                                                                                            |
|----------------|------------------------|-----------------|----------------------------------------------------------------------------------|--------------------------------------------------------|-----|-----------------------------------------------------------------------------------------------------------|--------------------------------------------------------------------|--------------------------------------------------------------------------------------------------------------------------------|---------------------------------------------------------------------------------------------------------------------------------------------------------------------------------------------------------------------------------------------------------------------------------------------------------------------------------------------------------------------------------------------------------------------------------------------|------------------------------------------------------------------------------------------------------------------------------------------------------------------------------------------------------------|
|                |                        |                 |                                                                                  | n = 54                                                 |     |                                                                                                           |                                                                    | satisfaction,<br><br>program acceptability,<br><br>Intention to act upon SDMP<br><br>emotional reaction to program information | <i>Subjective knowledge:</i> 2 item bespoke survey<br><br><i>Risk comprehension:</i> 4 item bespoke survey<br><br><i>Breast cancer concern:</i> 4 item bespoke survey<br><br><i>Desire to participate in the program:</i> 4 item bespoke survey<br><br><i>Satisfaction:</i> 7 item bespoke survey<br><br><i>Program acceptability:</i> 4 item bespoke survey<br><br><i>Emotional reaction to program information:</i> 4 item bespoke survey | found its rationale acceptable. Women who had strong emotional reactions to the information benefited less from the SDMP, whereas women with strong desires to participate in the decision benefited more. |
| Stalmeier 2009 | van Roosmalen 2004 a&b | The Netherlands | Study to compare the responsiveness of several instruments used to evaluate DA's | Participants from Van Roosmalen 2004 a & b (see above) | Yes | Two decision aids:<br>DA1: (reported in Van Roosmalen 2004 a)<br><br>DA2: (SDMI) reported in (reported in | Compared responsiveness of various DA evaluation measures in 2 DAs | Responsiveness (effect sizes) of various instruments                                                                           | Effect sizes calculated according to equation reported on p106 of article                                                                                                                                                                                                                                                                                                                                                                   | Three factors were identified related to Information, Well-being and Decision Making.<br><br>Within each factor, single item measures were as responsive as multi-item measures.                           |



|                   |              |                    |                                           |                                                                                                                                        |                                                                                                 |                              |                              |                                                                                                                                                      |                                                                                                                                                                                                                                                                                                                   |                                                                                                                                                                                                                                                                                                                                                  |
|-------------------|--------------|--------------------|-------------------------------------------|----------------------------------------------------------------------------------------------------------------------------------------|-------------------------------------------------------------------------------------------------|------------------------------|------------------------------|------------------------------------------------------------------------------------------------------------------------------------------------------|-------------------------------------------------------------------------------------------------------------------------------------------------------------------------------------------------------------------------------------------------------------------------------------------------------------------|--------------------------------------------------------------------------------------------------------------------------------------------------------------------------------------------------------------------------------------------------------------------------------------------------------------------------------------------------|
|                   |              |                    |                                           |                                                                                                                                        |                                                                                                 | Van<br>Roosmalen<br>2004 a)  |                              |                                                                                                                                                      |                                                                                                                                                                                                                                                                                                                   | Four single items, ‘the amount of information received for decision making,’ ‘strength of preference,’ ‘I weighed the pros and cons,’ and ‘General Health,’ were adequately responsive to the decision aids.                                                                                                                                     |
| Steenbeek<br>2021 | Harmsen 2018 | The<br>Netherlands | Non-<br>randomised<br>controlled<br>trial | Premenopau<br>sal BRCA 1/2<br>mutation<br>carriers (n=<br>585) taking<br>part in a<br>dutch<br>preference<br>trial (the<br>TUBA study) | Yes<br><br>14% had<br>history of<br>breast cancer<br><br>None affected<br>by ovarian<br>cancer. | Usual care +<br>DA (n = 282) | Usual care (UC)<br>(n = 283) | Actual choice,<br>Feasibility<br>Knowledge, cancer<br>worry, Decisional<br>conflict, Decisional<br>regret<br>Self-estimated<br>influence on decision | Validated<br>questionnaires<br>including:<br><br>Self-estimated<br>ovarian cancer<br>risk,<br><br>Cancer Worry<br>Scale & a<br>Decisional Conflict<br>Scale<br><br>Decisional regret<br>scale<br><br>DA arm received<br>additional<br>questions on<br>feasibility & self-<br>estimated<br>influence of the<br>DA. | Users of the decision aid<br>reported increased<br>knowledge about the<br>options and increased<br>insight in personal<br>values.<br><br>Knowledge on cancer<br>risk, decisional conflict,<br>decisional regret and<br>cancer worry were<br>similar in both arms.<br><br>Significantly more<br>women in DA arm chose<br>novel surgical strategy. |
| Tiller 2003       | Tiller 2003  | Australia          | Pilot testing<br>of DA                    | Women at<br>increased risk<br>of ovarian<br>cancer<br>attending a<br>familial<br>cancer clinic                                         | Not reported                                                                                    | DA                           | Not reported                 | Not reported                                                                                                                                         | Not reported                                                                                                                                                                                                                                                                                                      | Women reported that<br>the decision aid had<br>increased their<br>knowledge, led to more<br>accurate expectations of<br>benefits and risks,<br>assisted them in arriving<br>at a decision, and<br>reduced their decisional<br>conflict and uncertainty                                                                                           |

|                         |                         |                 |                             |                                                                                                                                                                        |                     |                |                              |                                                                                                                                                                            |                                                                                                                                                                                                                                                                                                                                                                                                    |                                                                                                                                                                                                                                                                                                                                                                                                                                                 |
|-------------------------|-------------------------|-----------------|-----------------------------|------------------------------------------------------------------------------------------------------------------------------------------------------------------------|---------------------|----------------|------------------------------|----------------------------------------------------------------------------------------------------------------------------------------------------------------------------|----------------------------------------------------------------------------------------------------------------------------------------------------------------------------------------------------------------------------------------------------------------------------------------------------------------------------------------------------------------------------------------------------|-------------------------------------------------------------------------------------------------------------------------------------------------------------------------------------------------------------------------------------------------------------------------------------------------------------------------------------------------------------------------------------------------------------------------------------------------|
|                         |                         |                 |                             |                                                                                                                                                                        |                     |                |                              |                                                                                                                                                                            |                                                                                                                                                                                                                                                                                                                                                                                                    |                                                                                                                                                                                                                                                                                                                                                                                                                                                 |
| Tiller 2006             | Tiller 2003             | Australia       | Randomised Controlled Trial | Women (age ≥ 30 years) with a family history of breast and/or ovarian cancer or of hereditary nonpolyposis colorectal cancer (n = 131)<br><br>With no hx of OC or BSO. | OC = No<br>BC = Yes | DA             | General educational pamphlet | Decisional conflict<br><br>knowledge about ovarian cancer risk management options<br><br>Psychological adjustment<br><br>At baseline, 2 weeks & 6 months post intervention | <i>Knowledge of Ovarian Cancer Risk Management Options</i> : 10 item true-false questionnaire<br><br><i>Decisional conflict</i> : modified Decisional Conflict Scale (DCS)<br><br><i>Psychological adjustment</i> :<br><br>7 item intrusion subscale Impact of Event Scale (IES)<br><br>6 item short form State-Trait Anxiety Inventory (STAI)<br><br>Hospital Anxiety and Depression Scale (HADS) | Two weeks postintervention, the intervention group demonstrated a significant decrease in decisional conflict compared to the control group (t = 2.4, P < 0.025) and a trend for a greater increase in knowledge about risk management options (t = 2.1, P = 0.037).<br><br>No significant differences were found 6 months post-intervention.<br>No significant differences between groups were observed for any of the psychological outcomes. |
| Van Roosmalen BJC 2004a | VAN ROOSMALEN BJC 2004a | The Netherlands | Randomised controlled trial | Women undergoing testing for a BRCA1/2 mutation<br>n= 368<br>DA group (n = 184), Control                                                                               | Yes                 | DA+ usual care | Usual care                   | Strength of treatment preference<br><br>Decision uncertainty<br><br>Preference for decision-making<br><br>Subjective knowledge                                             | <i>Strength of treatment preference</i> : 4-point Likert scale questionnaire<br><br><i>Decision uncertainty</i> : 3 items related to                                                                                                                                                                                                                                                               | DA had no impact on decision uncertainty,<br><br>Women randomised to the DA more frequently considered prophylactic surgery,                                                                                                                                                                                                                                                                                                                    |

|  |  |  |  |                                                                                                                                                                                                                                                                                                                                                                                                                                                                         |  |  |  |                                                                                                              |                                                                                                                                                                                                                                                                                                                                                                                                                                                                                                                                           |                                                                                                                                                                                          |
|--|--|--|--|-------------------------------------------------------------------------------------------------------------------------------------------------------------------------------------------------------------------------------------------------------------------------------------------------------------------------------------------------------------------------------------------------------------------------------------------------------------------------|--|--|--|--------------------------------------------------------------------------------------------------------------|-------------------------------------------------------------------------------------------------------------------------------------------------------------------------------------------------------------------------------------------------------------------------------------------------------------------------------------------------------------------------------------------------------------------------------------------------------------------------------------------------------------------------------------------|------------------------------------------------------------------------------------------------------------------------------------------------------------------------------------------|
|  |  |  |  | <p>group (n = 184)</p> <p>Women excluded if: diagnosed with distant metastases, had undergone both BM &amp; BSO, or had been treated with chemotherapy, radiotherapy, or surgery for BC OR OC &lt; 1 month before blood sampling.</p> <p><i>Sub group:</i></p> <p>To evaluate the impact of timing, mutation carriers who had received the DA before the test result (n = 47) were compared to mutation carriers who received the DA after the test result (n = 42)</p> |  |  |  | <p>Amount of received information</p> <p>Satisfaction with quality of information</p> <p>Risk perception</p> | <p>the uncertainty subscale of the Decisional Conflict Scale</p> <p><i>Preference for decision-making:</i> 2 decision-making items from the Problem-Solving Decision-Making Scale (PSDM)</p> <p><i>Subjective knowledge:</i> Questionnaire, items rated on 10 point scale.</p> <p><i>Amount of received information:</i> rated on 7 point scale</p> <p><i>Satisfaction with quality of information:</i> 13-item questionnaire. Items rated on on a 6-point scale</p> <p><i>Risk perception: 8 cancer risk items rated from 0-100%</i></p> | <p>DA group felt better informed &amp; showed more accurate risk perceptions.</p> <p>Timing of the DA (before versus after genetic test result) had no effect on any of the outcomes</p> |
|--|--|--|--|-------------------------------------------------------------------------------------------------------------------------------------------------------------------------------------------------------------------------------------------------------------------------------------------------------------------------------------------------------------------------------------------------------------------------------------------------------------------------|--|--|--|--------------------------------------------------------------------------------------------------------------|-------------------------------------------------------------------------------------------------------------------------------------------------------------------------------------------------------------------------------------------------------------------------------------------------------------------------------------------------------------------------------------------------------------------------------------------------------------------------------------------------------------------------------------------|------------------------------------------------------------------------------------------------------------------------------------------------------------------------------------------|

|                        |                        |                 |                             |                                                                                                                                                                                                                                                                                                                                   |     |                                                                                                                                                        |                                                                                                           |                                                                                                                                                                                                                                                                                                 |                                                                                                                                                                                                                                                                                                                                                                                                                                                                                                                                                                                                                                             |                                                                                                                                                                                                                                                                                                                                                                                                                                                                                      |
|------------------------|------------------------|-----------------|-----------------------------|-----------------------------------------------------------------------------------------------------------------------------------------------------------------------------------------------------------------------------------------------------------------------------------------------------------------------------------|-----|--------------------------------------------------------------------------------------------------------------------------------------------------------|-----------------------------------------------------------------------------------------------------------|-------------------------------------------------------------------------------------------------------------------------------------------------------------------------------------------------------------------------------------------------------------------------------------------------|---------------------------------------------------------------------------------------------------------------------------------------------------------------------------------------------------------------------------------------------------------------------------------------------------------------------------------------------------------------------------------------------------------------------------------------------------------------------------------------------------------------------------------------------------------------------------------------------------------------------------------------------|--------------------------------------------------------------------------------------------------------------------------------------------------------------------------------------------------------------------------------------------------------------------------------------------------------------------------------------------------------------------------------------------------------------------------------------------------------------------------------------|
| VanRoosmalen JCO 2004b | VANROOSMALEN JCO 2004b | The Netherlands | Randomised controlled trial | <p>Female BRCA 1/2 mutation carriers (n = 88)</p> <p>Intervention group (n = 44)</p> <p>Control group (n = 44)</p> <p>Women excluded if: diagnosed with distant metastases, had undergone both BM &amp; BSO, or had been treated with chemotherapy, radiotherapy, or surgery for BC OR OC &lt; 1 month before blood sampling.</p> | Yes | <p>Shared Decision Making Intervention (SDMI) + usual care</p> <p>All participants had previously received DA described in VAN ROOSMALEN BJC 2004a</p> | <p>Usual care</p> <p>All participants had previously received DA described in VAN ROOSMALEN BJC 2004a</p> | <p>Strength of treatment preference,</p> <p>Decision uncertainty,</p> <p>Perceived participation in decision making,</p> <p>Weighing treatment choice</p> <p>Perceived preference of the specialists,</p> <p>Support and advice from specialists.</p> <p>Well-being</p> <p>Treatment choice</p> | <p><i>Strength of treatment preference:</i> survey, preference for options rated on 4 point likert scale</p> <p><i>Decision uncertainty:</i> 3 items related to the uncertainty subscale of the Decisional Conflict Scale</p> <p><i>Perceived participation in decision making:</i> 2 decision-making items from the Problem-Solving Decision-Making scale, rated on 5 point scale</p> <p><i>Weighing treatment choice:</i> single item survey rated on 5 point scale.</p> <p><i>Perceived preference of the specialists:</i> Women were asked whether they felt that the specialists held a treatment preference (Y/N) and, if so, its</p> | <p>In the short term, 3 months after the test result, the SDMI had no effect.</p> <p>In the long term, 9 months after the test result, the SDMI group reported less intrusive thoughts about cancer in the family &amp; better general health.</p> <p>SDMI group reported a stronger treatment preference and more strongly agreed to having weighed the pros and cons for the breast treatment.</p> <p>Beneficial effects of SDMI found only in cancer unaffected participants.</p> |
|------------------------|------------------------|-----------------|-----------------------------|-----------------------------------------------------------------------------------------------------------------------------------------------------------------------------------------------------------------------------------------------------------------------------------------------------------------------------------|-----|--------------------------------------------------------------------------------------------------------------------------------------------------------|-----------------------------------------------------------------------------------------------------------|-------------------------------------------------------------------------------------------------------------------------------------------------------------------------------------------------------------------------------------------------------------------------------------------------|---------------------------------------------------------------------------------------------------------------------------------------------------------------------------------------------------------------------------------------------------------------------------------------------------------------------------------------------------------------------------------------------------------------------------------------------------------------------------------------------------------------------------------------------------------------------------------------------------------------------------------------------|--------------------------------------------------------------------------------------------------------------------------------------------------------------------------------------------------------------------------------------------------------------------------------------------------------------------------------------------------------------------------------------------------------------------------------------------------------------------------------------|

|  |  |  |  |  |  |  |  |  |                                                                                                                                                                                                                                                                                                                                                                                                                                                                                                                                                                                                                                                                                                                                                   |  |
|--|--|--|--|--|--|--|--|--|---------------------------------------------------------------------------------------------------------------------------------------------------------------------------------------------------------------------------------------------------------------------------------------------------------------------------------------------------------------------------------------------------------------------------------------------------------------------------------------------------------------------------------------------------------------------------------------------------------------------------------------------------------------------------------------------------------------------------------------------------|--|
|  |  |  |  |  |  |  |  |  | <div>strength<br/>(strong/weak)</div> <div>Support and<br/>advice from<br/>specialists:<br/>Women asked<br/>whether they had<br/>wanted more<br/>support &amp; advice<br/>from their<br/>specialists<br/>regarding their<br/>treatment choice,<br/>rated on 7 point<br/>scale</div> <div>Well-being:<br/>anxiety (state<br/>anxiety subscale<br/>of the Spielberger<br/>State-Trait<br/>Anxiety<br/>Inventory),</div> <div>Depression<br/>(Center for<br/>Epidemiologic<br/>Studies<br/>Depression Scale)<br/>intrusive and<br/>avoidance<br/>thoughts about<br/>cancer in the<br/>family (intrusion<br/>and avoidance<br/>subscale from the<br/>Impact of Event<br/>Scale).</div> <div>women rated<br/>their general<br/>health during the</div> |  |
|--|--|--|--|--|--|--|--|--|---------------------------------------------------------------------------------------------------------------------------------------------------------------------------------------------------------------------------------------------------------------------------------------------------------------------------------------------------------------------------------------------------------------------------------------------------------------------------------------------------------------------------------------------------------------------------------------------------------------------------------------------------------------------------------------------------------------------------------------------------|--|

|  |  |  |  |  |  |  |  |  |                                                                                                                                                                                                                                                                                                                                                                                  |  |
|--|--|--|--|--|--|--|--|--|----------------------------------------------------------------------------------------------------------------------------------------------------------------------------------------------------------------------------------------------------------------------------------------------------------------------------------------------------------------------------------|--|
|  |  |  |  |  |  |  |  |  | <p>last week on an 11-point scale</p> <p><i>Treatment choice:</i> Survey, women indicated their intended treatment choice for the breasts and/or ovaries</p> <p>Women answered the question, “How suitable do you find prophylactic mastectomy for yourself?” by rating on a 10-point scale</p> <p>Data on the actually performed treatment also collected by questionnaire.</p> |  |
|--|--|--|--|--|--|--|--|--|----------------------------------------------------------------------------------------------------------------------------------------------------------------------------------------------------------------------------------------------------------------------------------------------------------------------------------------------------------------------------------|--|
